# Supplementary material for: Transcriptional Interplay between Malassezia restricta and Staphylococcus Species Co-Existing in the Skin Environment
Source: PubMed Central journal article supplement (PMC10084760; doi:10.4014/jmb.2212.12026), 2023-01-06
Supplement: jmb-33-3-319-supple.pdf [file jmb-33-3-319-supple.pdf]

## Supplementary Information

### Supplementary Figures

#### Supplemental Figure1

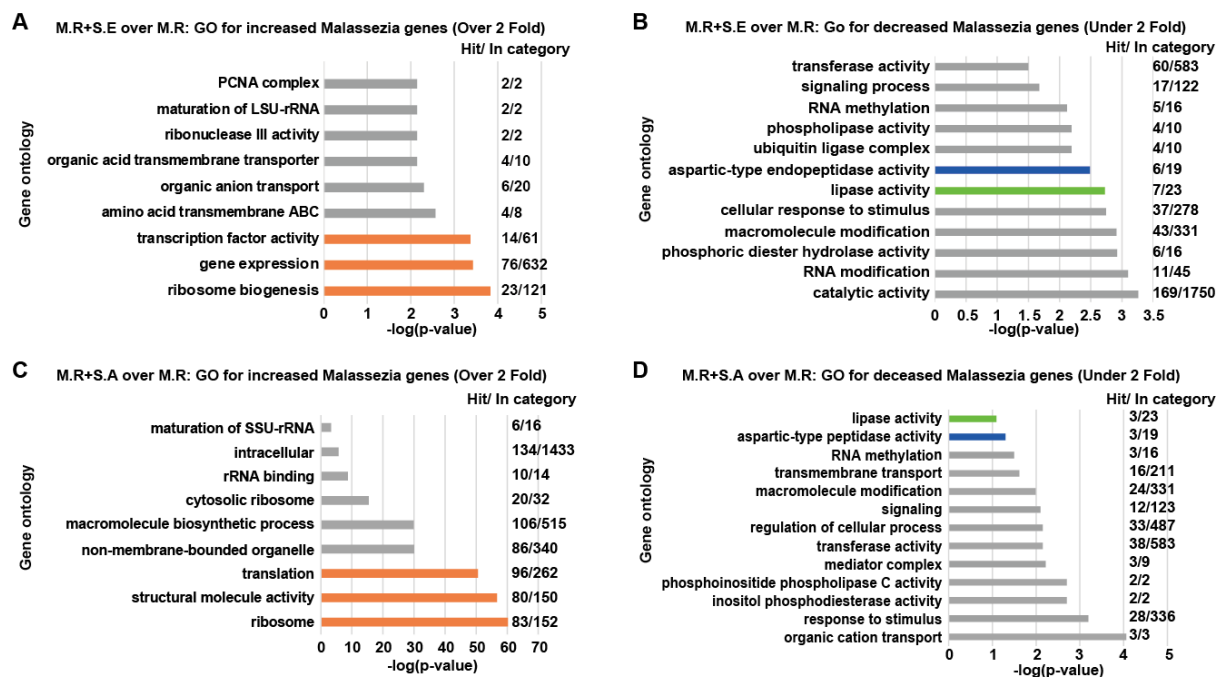

**Supplementary Figure 1. Gene ontology analyses for genes changed more than twice.**

**A:** Gene ontology for increased *M. restricta* genes at co-culture with *S. epidermidis*.

**B:** Gene ontology for decreased *M. restricta* genes at co-culture with *S. epidermidis*.

**C:** Gene ontology for increased *M. restricta* genes at co-culture with *S. aureus*.

**D:** Gene ontology for decreased *M. restricta* genes at co-culture with *S. aureus*.

## Supplemental Figure 2

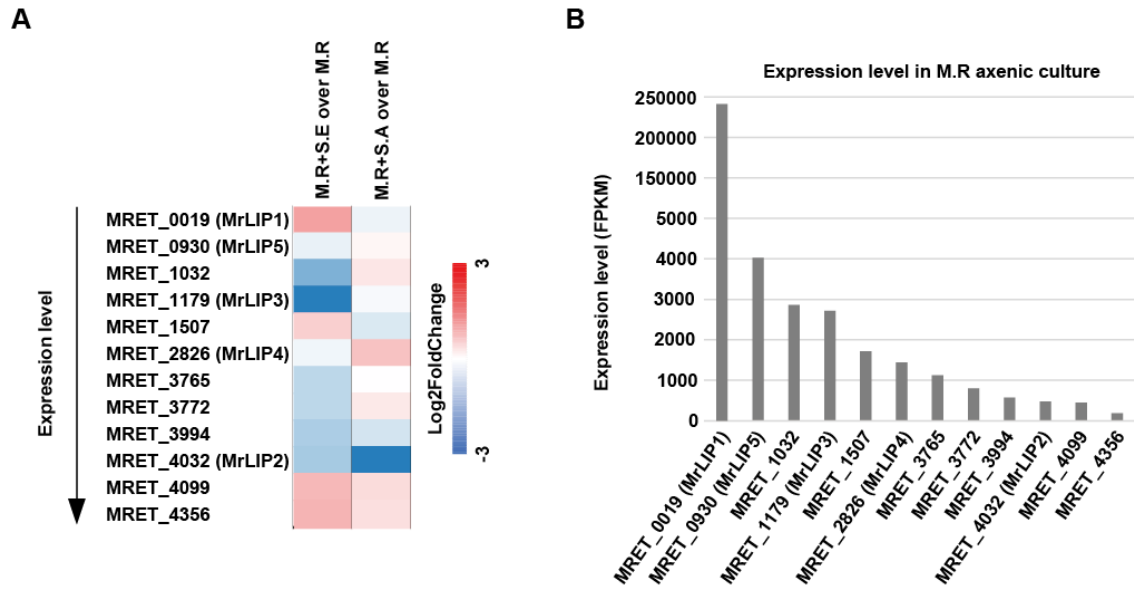

**Supplementary Figure 2. Transcriptional changes of lipase coding genes in *M. restricta* by co-culture with *Staphylococcus* spp.**

**A:** Expressional changes for genes encoding lipase at co-cultured conditions. Lipase coding genes were ordered from top to bottom on the basis of expression level.

**B:** Expression level of genes encoding lipase in *M. restricta* (M.R) axenic culture.

### Supplemental Figure3

A

| type           | number | SignalP |
|----------------|--------|---------|
| Aspartic (A)   | 13     | 11      |
| Cysteine (C)   | 36     | 0       |
| Glutamic (G)   | 0      | 0       |
| Metallo (M)    | 40     | 4       |
| Asparagine (N) | 0      | 0       |
| Mixed (P)      | 0      | 0       |
| Serine (S)     | 30     | 7       |
| Threonine (T)  | 16     | 1       |
| Unknown (U)    | 0      | 0       |
| total          | 135    | 23      |

  

|           |
|-----------|
| MRET_0835 |
| MRET_1618 |
| MRET_2166 |
| MRET_2661 |
| MRET_2827 |
| MRET_2886 |
| MRET_3770 |
| MRET_4281 |
| MRET_4282 |
| MRET_4286 |
| MRET_4390 |

B

| MRET_Gene | product                    | Coverage [%] | # Peptides | # PSMs | # Unique Peptides | # AAs | MW [kDa] | Score Sequest HT |
|-----------|----------------------------|--------------|------------|--------|-------------------|-------|----------|------------------|
| MRET_3770 | Secreted aspartyl protease | 36           | 15         | 33     | 11                | 375   | 42       | 95.82            |
| MRET_2827 | Secreted aspartyl protease | 43           | 16         | 25     | 16                | 396   | 42.5     | 70.2             |
| MRET_2825 | Secreted aspartyl protease | 23           | 9          | 19     | 5                 | 375   | 42.4     | 54.18            |
| MRET_2661 | Aspartic endopeptidase     | 18           | 9          | 15     | 9                 | 392   | 42.8     | 42.78            |

### Supplementary Figure 3. Prediction of secretory aspartyl protease and the result of mass-spectrometry.

**A:** Prediction for type of proteases in *M. restricta* using MEROPS (<https://www.ebi.ac.uk/merops/>). And number of secretory proteases predicted by SignalP5.0. Aspartic type proteases are shown in red color.

**B:** Result of Liquid chromatography-tandem mass spectrometry (LC-MS/MS) for putative aspartyl proteases. LC-MS/MS was conducted by the Proteinworks ([www.proteinworks.co.kr](http://www.proteinworks.co.kr)).

## Supplemental Figure4

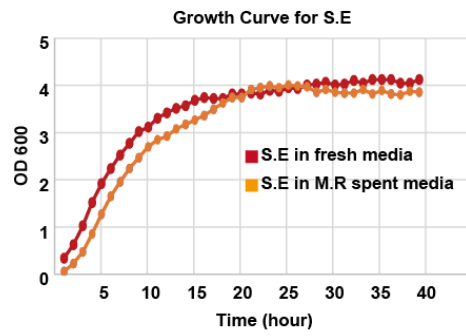

Supplementary Figure 4. Growth curve of *S. epidermidis* in fresh or *M. restricta* spent media.
